# Supplementary material
Source: PubMed Central journal article supplement (PMC1482577)
Supplement: pnas_0603312103_1.pdf [file pnas_0603312103_1.pdf]

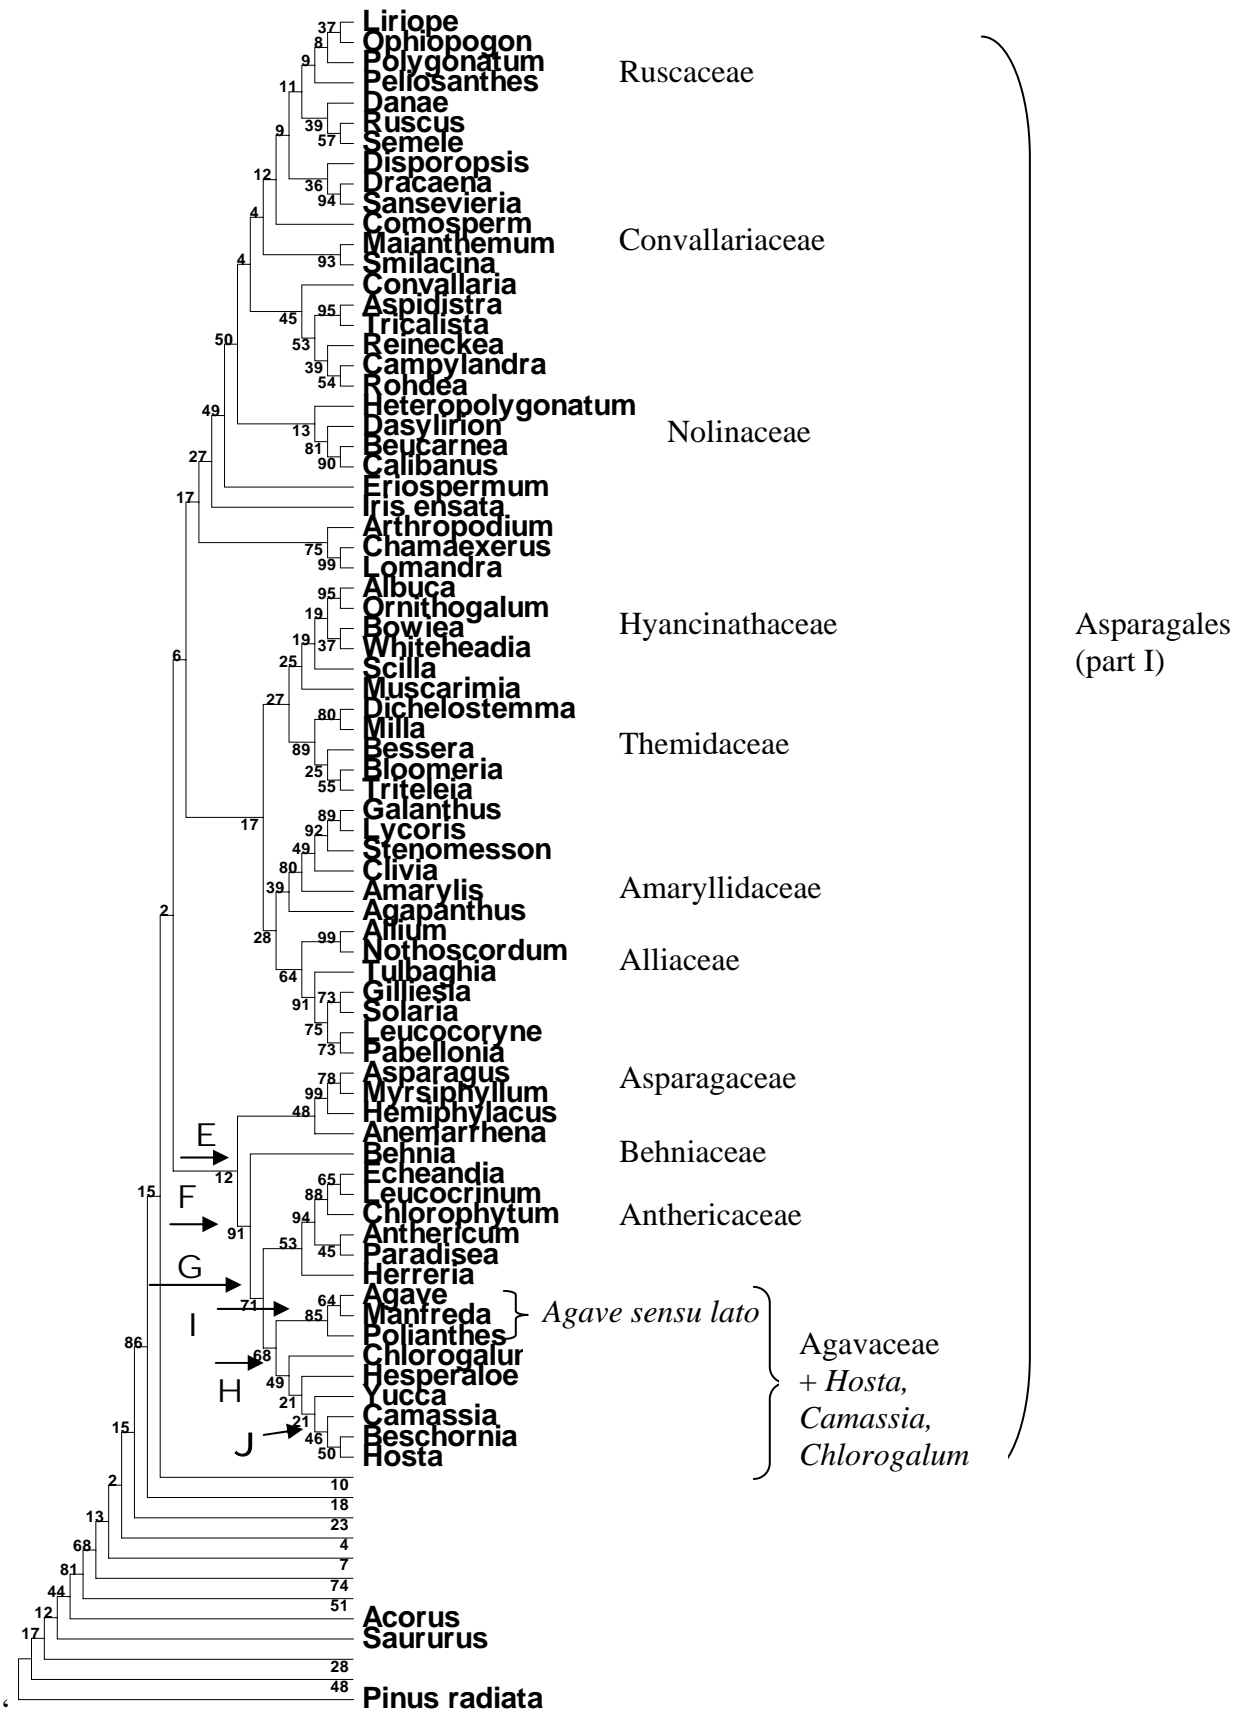

Trillaceae

Liliaceae

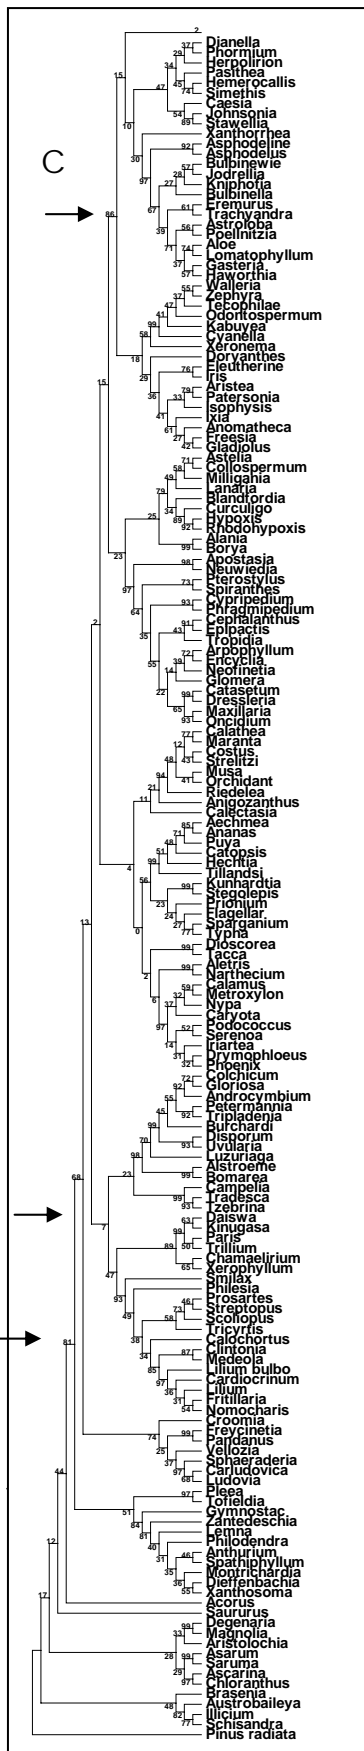

Phormiaceae

Xanthorrhoeaceae

Asphodelaceae

Tecophilaceae

Asparagales part II

Iridaceae

Blandfordiaceae

Hypoxidaceae

Boryaceae

Orchidaceae

Zingiberiflorae

Zingiberales

Bromeliaceae

Poales

Areaceae

Arecales

Colchicaceae

Alstromeriaceae

Liliales

Melanthiaceae

Smilacaceae

Lilaceae

Cyclanthaceae

Pandanales

Araceae

Ariflorae

Acoraceae

Acorales

Primitive Dicots

*Pinus radiata*
